# Supplementary material for: Disease-specific classification using deconvoluted whole blood gene expression
Source: PubMed Central journal article supplement (PMC5011717; doi:10.1038/srep32976), 2016-09-06
Supplement: srep32976-s1.pdf [file srep32976-s1.pdf]

## **Supplementary Materials for**

### **Disease-specific classification using deconvoluted whole blood gene expression**

Li Wang<sup>1,2</sup>, William K. Oh<sup>3</sup>, Jun Zhu<sup>1,2,3,\*</sup>

<sup>1</sup>Icahn Institute for Genomics and Multiscale Biology; <sup>2</sup>Department of Genetics and Genomic Sciences; <sup>3</sup>The Tisch Cancer Institute, Division of Hematology and Medical Oncology; Icahn School of Medicine at Mount Sinai, NY, USA.

## Supplementary Tables

**Table S1** Availability of age, gender and race information for individual sample in each dataset.

|                                                    | age | gender | race |
|----------------------------------------------------|-----|--------|------|
| Aging_GSE33828                                     | NO  | YES    | NO   |
| ASLE_GSE19491                                      | YES | YES    | YES  |
| BacterialPneumonia_GSE20346                        | NO  | NO     | NO   |
| BreastCancer_GSE16443                              | YES | NO     | NO   |
| CRPC_GSE37199                                      | NO  | NO     | NO   |
| CRPChighrisk_GSE37199                              | NO  | NO     | NO   |
| ColorectalCancer_E-MEXP-3756                       | NO  | NO     | NO   |
| CoronaryArteryDisease_Cathgen_GSE20686             | NO  | NO     | NO   |
| CoronaryArteryDisease_PREDICT_GSE20686             | YES | YES    | NO   |
| InfluenzaVaccine_GSE30101                          | YES | YES    | YES  |
| InfluenzaVaccine_day28_GSE30101                    | YES | YES    | YES  |
| InfluenzaVaccine_day3_GSE30101                     | YES | YES    | YES  |
| InfluenzaVaccine_day7_GSE30101                     | YES | YES    | YES  |
| IntermediateCoronaryArteryDisease_Cathgen_GSE20686 | NO  | NO     | NO   |
| LTB_test_GSE19491                                  | YES | YES    | YES  |
| LTB_training_GSE19491                              | YES | YES    | YES  |
| LungCancerStage_GSE20189                           | NO  | NO     | NO   |
| LungCancer_GSE12771                                | NO  | NO     | NO   |
| LungCancer_GSE20189                                | NO  | NO     | NO   |
| LungCancer_GSE42834                                | NO  | YES    | YES  |
| MajorDepressiveDisorder_GSE19738                   | YES | YES    | NO   |
| MultipleSclerosis_GSE41850                         | NO  | YES    | NO   |
| Obesity_GSE18897                                   | NO  | YES    | NO   |
| Obesity_E-MTAB-54                                  | YES | YES    | NO   |
| PSLE_GSE19491                                      | YES | YES    | YES  |
| PTB_test_GSE19491                                  | YES | YES    | YES  |
| PTB_training_GSE19491                              | YES | YES    | YES  |
| Parkinson_GSE6613                                  | NO  | NO     | NO   |
| Pneumonia_GSE42834                                 | NO  | YES    | YES  |
| PneumovaxVaccine_GSE30101                          | YES | YES    | YES  |
| PneumovaxVaccine_day28_GSE30101                    | YES | YES    | YES  |
| PneumovaxVaccine_day3_GSE30101                     | YES | YES    | YES  |
| PneumovaxVaccine_day7_GSE30101                     | YES | YES    | YES  |
| RheumatoidArthritis_GSE17755                       | YES | YES    | NO   |
| STAPH_GSE19491                                     | YES | YES    | YES  |
| STILL_GSE19491                                     | YES | YES    | YES  |

|                                |     |     |     |
|--------------------------------|-----|-----|-----|
| STREP_GSE19491                 | YES | YES | YES |
| Sarcoid_GSE42834               | NO  | YES | YES |
| Schizophrenia_GSE38485         | YES | YES | NO  |
| SevereInfluenza_GSE20346       | NO  | NO  | NO  |
| SleepRestriction_16.5_GSE39445 | NO  | NO  | NO  |
| SleepRestriction_25.5_GSE39445 | NO  | NO  | NO  |
| SleepRestriction_34.5_GSE39445 | NO  | NO  | NO  |
| SleepRestriction_7.5_GSE39445  | NO  | NO  | NO  |
| SleepRestriction_GSE39445      | NO  | NO  | NO  |
| TB_GSE42834                    | NO  | YES | YES |

**Table S2** Demographic characteristic for case samples in each dataset

|                                                    | Age<br>(median) | Female<br>(Fraction) | White<br>(Fraction) |
|----------------------------------------------------|-----------------|----------------------|---------------------|
| Aging_GSE33828                                     | 64.2            | 0.55                 | NA                  |
| ASLE_GSE19491                                      | 36              | 0.86                 | 0.54                |
| BacterialPneumonia_GSE20346                        | 63              | 0.5                  | NA                  |
| BreastCancer_GSE16443                              | 57              | 1                    | NA                  |
| ColorectalCancer_E-MEXP-3756                       | 56.6            | 0.55                 | NA                  |
| CoronaryArteryDisease_Cathgen_GSE20686             | 63              | 0.33                 | 0.69                |
| CoronaryArteryDisease_PREDICT_GSE20686             | 64              | 0.24                 | 0.93                |
| CRPC_GSE37199                                      | NA              | NA                   | NA                  |
| CRPChighrisk_GSE37199                              | NA              | NA                   | NA                  |
| InfluenzaVaccine_day28_GSE30101                    | 30.5            | 0.5                  | 0.61                |
| InfluenzaVaccine_day3_GSE30101                     | 30.5            | 0.5                  | 0.5                 |
| InfluenzaVaccine_day7_GSE30101                     | 30.5            | 0.5                  | 0.5                 |
| InfluenzaVaccine_GSE30101                          | 32              | 0.50                 | 0.52                |
| IntermediateCoronaryArteryDisease_Cathgen_GSE20686 | 63              | 0.33                 | 0.69                |
| LTB_test_GSE19491                                  | 33              | 0.52                 | 0.14                |
| LTB_training_GSE19491                              | 31              | 0.5                  | 0.13                |
| LungCancer_GSE12771                                | 63              | 0.37                 | NA                  |
| LungCancer_GSE20189                                | 67              | 0.49                 | NA                  |
| LungCancer_GSE42834                                | 59              | 0.38                 | 0.94                |
| LungCancerStage_GSE20189                           | 67              | 0.49                 | NA                  |
| MajorDepressiveDisorder_GSE19734                   | 43              | 0.64                 | NA                  |
| MultipleSclerosis_GSE41850                         | 44              | 0.69                 | NA                  |
| Obese_GSE18897                                     | 52.2            | 0.6                  | NA                  |
| Obesity_E-MTAB-54                                  | 48              | 0.51                 | NA                  |
| Parkinson_GSE6613                                  | 69.4            | 0.22                 | NA                  |
| Pneumonia_GSE42834                                 | 63              | 0.37                 | 0.46                |

|                                 |      |      |      |
|---------------------------------|------|------|------|
| PneumovaxVaccine_day28_GSE30101 | 31   | 0.53 | 0.87 |
| PneumovaxVaccine_day3_GSE30101  | 29   | 0.5  | 0.78 |
| PneumovaxVaccine_day7_GSE30101  | 29   | 0.5  | 0.78 |
| PneumovaxVaccine_GSE30101       | 29   | 0.50 | 0.80 |
| PSLE_GSE19491                   | 16   | 0.84 | 0.15 |
| PTB_test_GSE19491               | 33   | 0.33 | 0.33 |
| PTB_training_GSE19491           | 29   | 0.46 | 0.23 |
| RheumatoidArthritis_GSE17755    | 54   | 0.83 | NA   |
| Sarcoid_GSE42834                | 47   | 0.53 | 0.40 |
| Schizophrenia_GSE38485          | 40.5 | 0.28 | NA   |
| SevereInfluenza_GSE20346        | 33   | 0.75 | NA   |
| SleepRestriction_16.5_GSE39445  | 27.5 | 0.46 | NA   |
| SleepRestriction_25.5_GSE39445  | 27.5 | 0.46 | NA   |
| SleepRestriction_34.5_GSE39445  | 27.5 | 0.46 | NA   |
| SleepRestriction_7.5_GSE39445   | 27.5 | 0.46 | NA   |
| SleepRestriction_GSE39445       | 27.5 | 0.46 | NA   |
| STAPH_GSE19491                  | 8    | 0.5  | 0.23 |
| STILL_GSE19491                  | 38   | 0.48 | 0.74 |
| STREP_GSE19491                  | 5    | 0.5  | 0.33 |
| TB_GSE42834                     | 39   | 0.46 | 0.28 |

**Table S3** Number of datasets inside and outside of the tight cluster in Figure 1 in each disease category. We excluded some longitudinal datasets (those with the column of disease name blank in Table 1 except for Aging\_GSE33828) in order to avoid multiple count of the same disease dataset.

|                                                  | outside | inside |
|--------------------------------------------------|---------|--------|
| Aging                                            | 0       | 1      |
| Cardiovascular disease                           | 1       | 1      |
| Cancer                                           | 1       | 5      |
| Inflammatory and infectious diseases             | 4       | 11     |
| Neuronal disease                                 | 4       | 0      |
| Non-morbid condition (vaccine/sleep deprivation) | 3       | 0      |
| Metabolic disease                                | 2       | 0      |

# Supplementary Figures

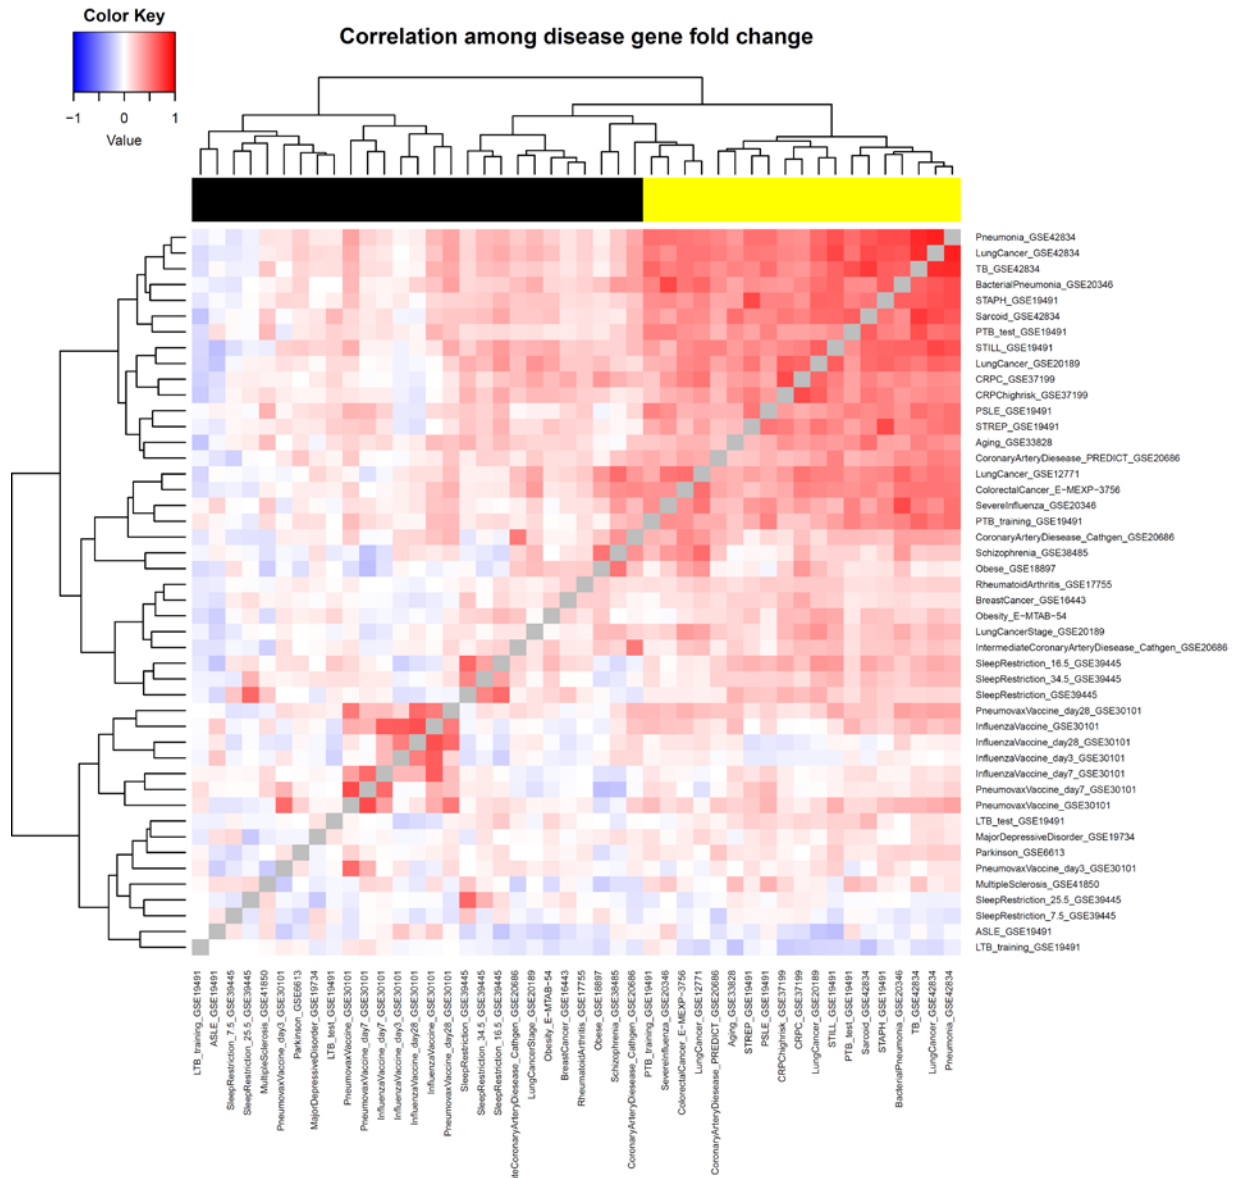

**Figure S1** Correlation among gene expression changes of diverse disease signature genes after correcting for the effect of age, gender and race. Yellow color in the side bar indicates the dataset is inside the tight cluster in Figure 1

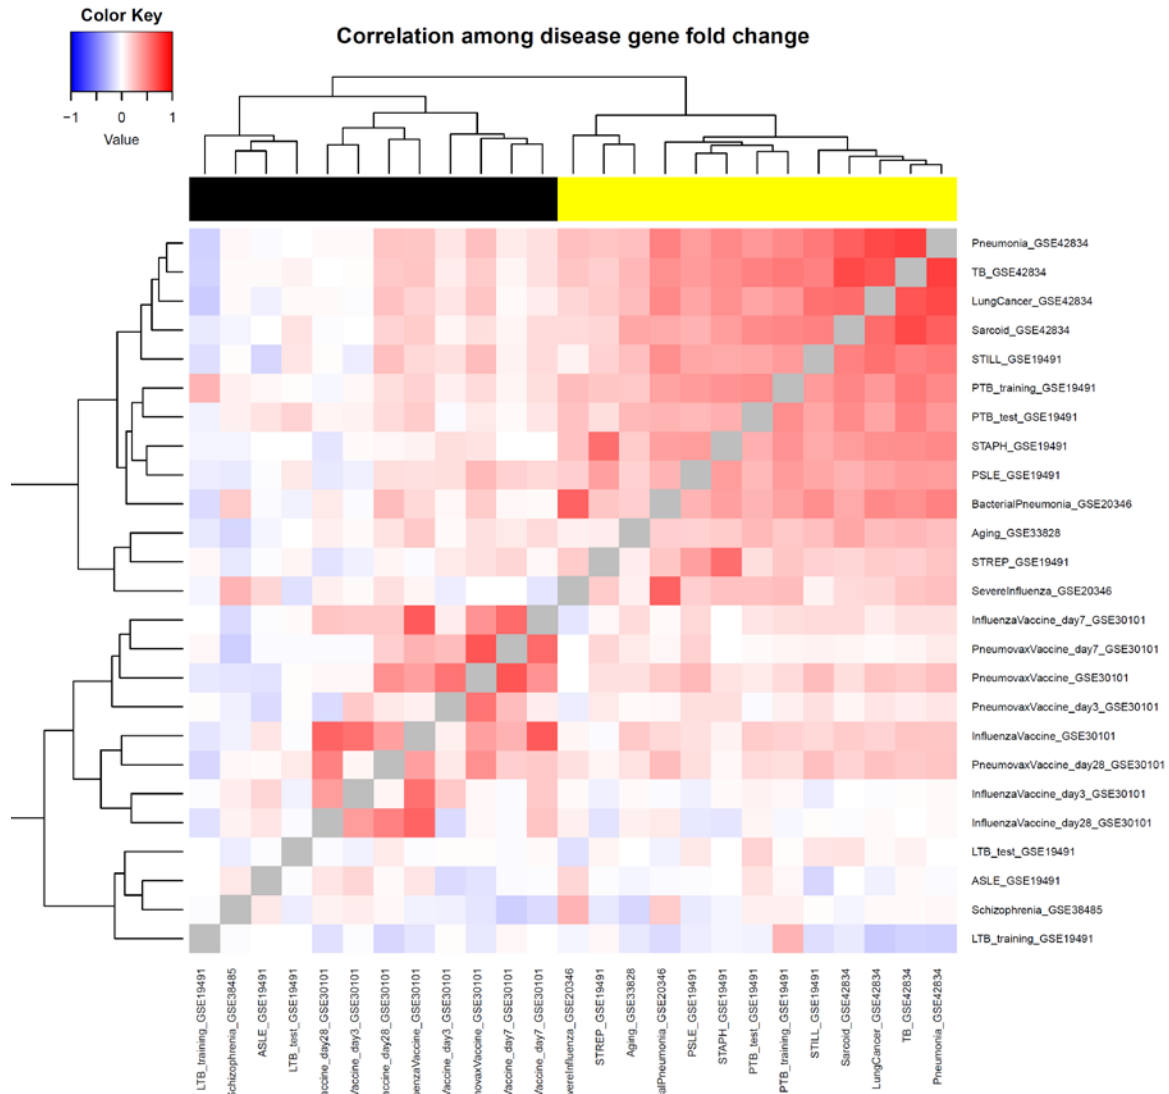

**Figure S2** Correlation among gene expression changes for 25 datasets generated on illumina humanHT-12. Yellow color in the side bar indicates the dataset is inside the tight cluster in Figure 1.

A)

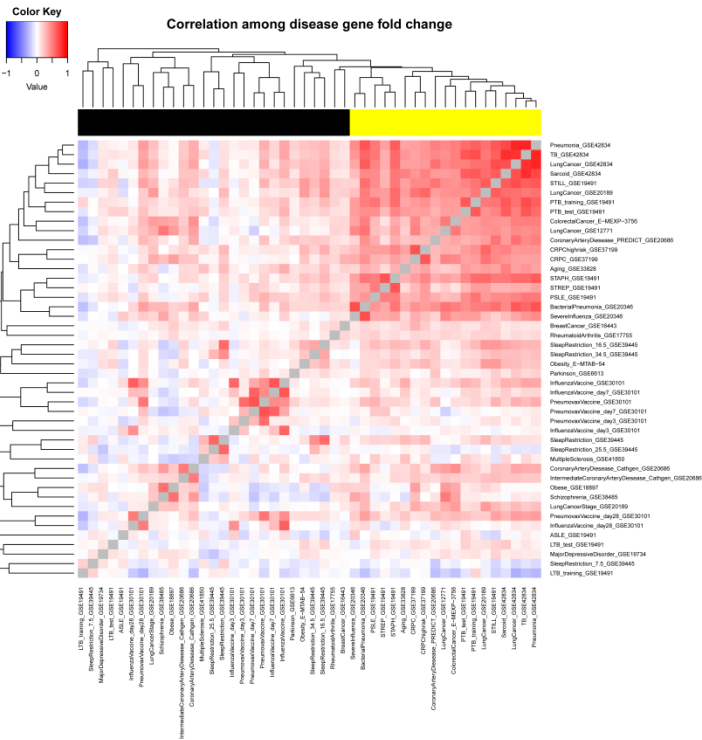

B)

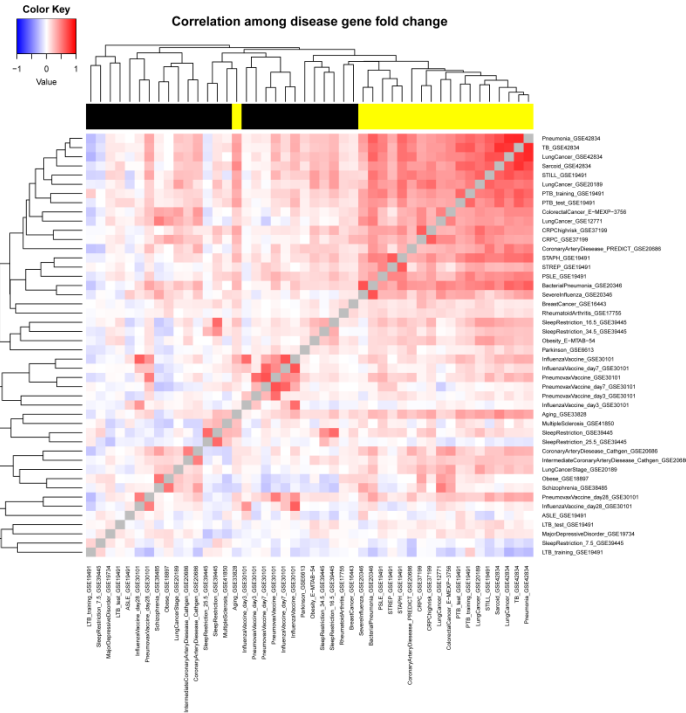

**Figure S3** Correlation among expression change profiles of disease informative genes which were pooled from top 300 (A) and 500 (B) differentially expressed genes in each dataset. Yellow color in the side bar indicates the dataset is inside the tight cluster in Figure 1

## Overlap of differentially expressed genes among 19 common datasets

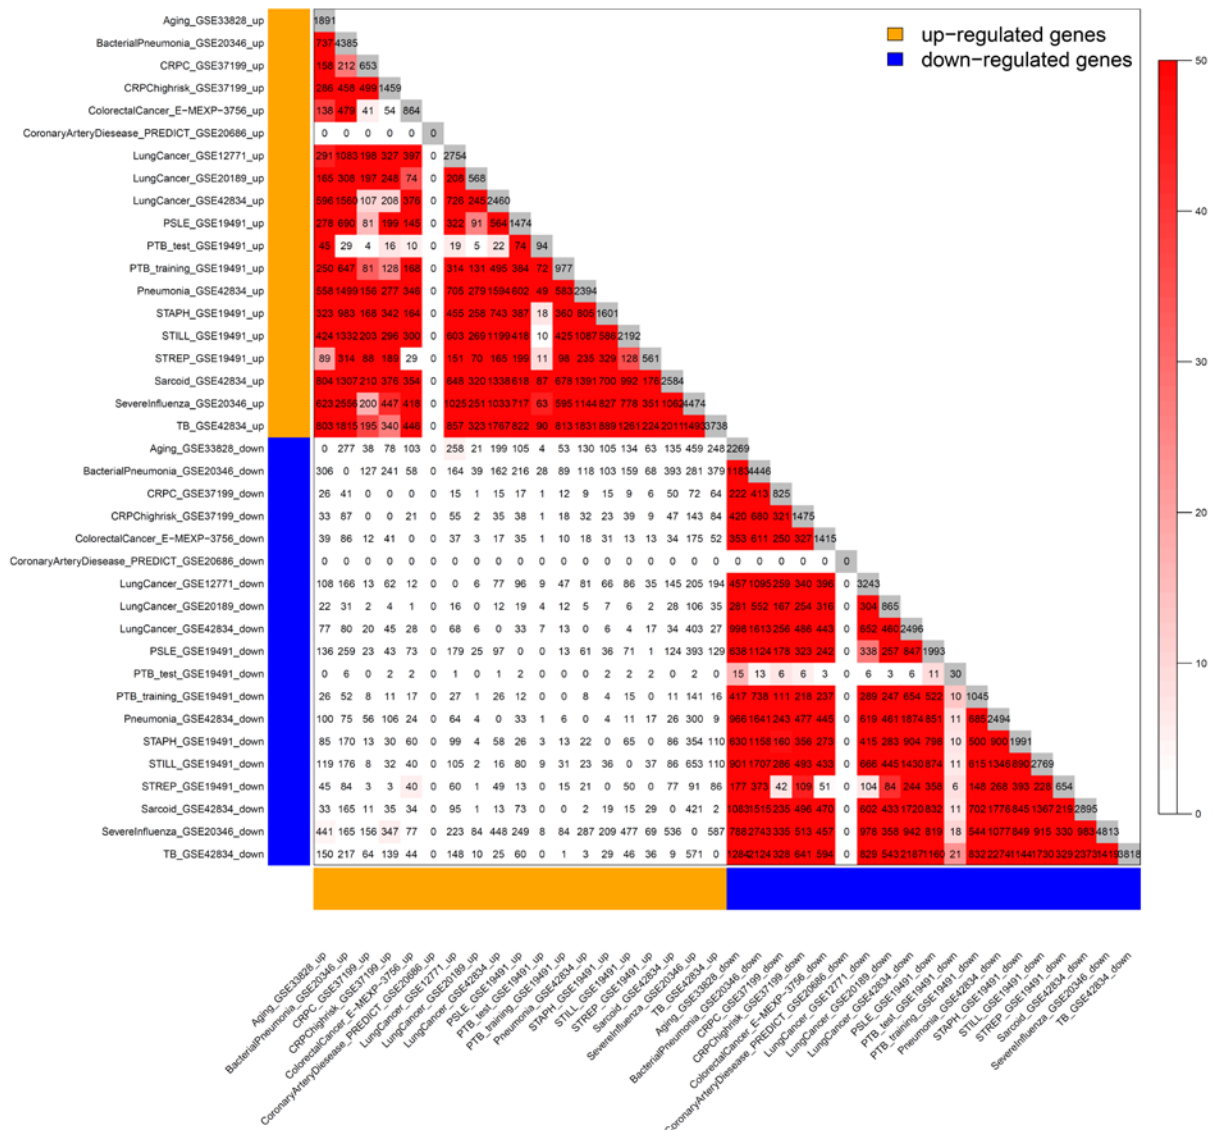

**Figure S4** Overlaps of differentially expressed genes among 19 common datasets. Each row or column corresponds to one differentially expressed gene list. Orange color in the side bar represents significantly up-regulated gene list (FDR<0.1 using R package limma), and blue color represents significantly down-regulated gene list. Numbers in the table indicate gene counts in the intersection of two gene lists. Coloring of the table encodes  $-\log(p)$ , with  $p$  being the Fisher's exact test  $p$ -value for the overlap of the two modules.



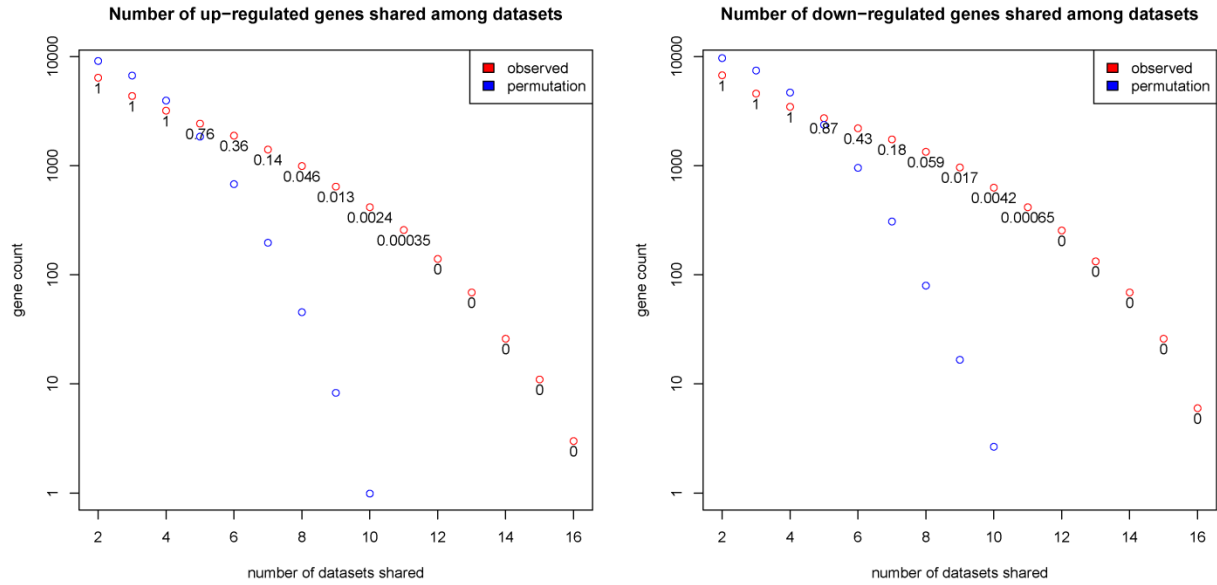

**Figure S5** Numbers of significantly differentially expressed genes shared among the 19 similar datasets. Y axes represents the number of genes shared by  $\geq n$  datasets ( $n$  as indicates by X axes). Red color indicates the observed gene counts, and blue color indicates the gene counts under permutation. The number under the red dots represents the  $FDR = \text{permutation}/\text{observed}$ .

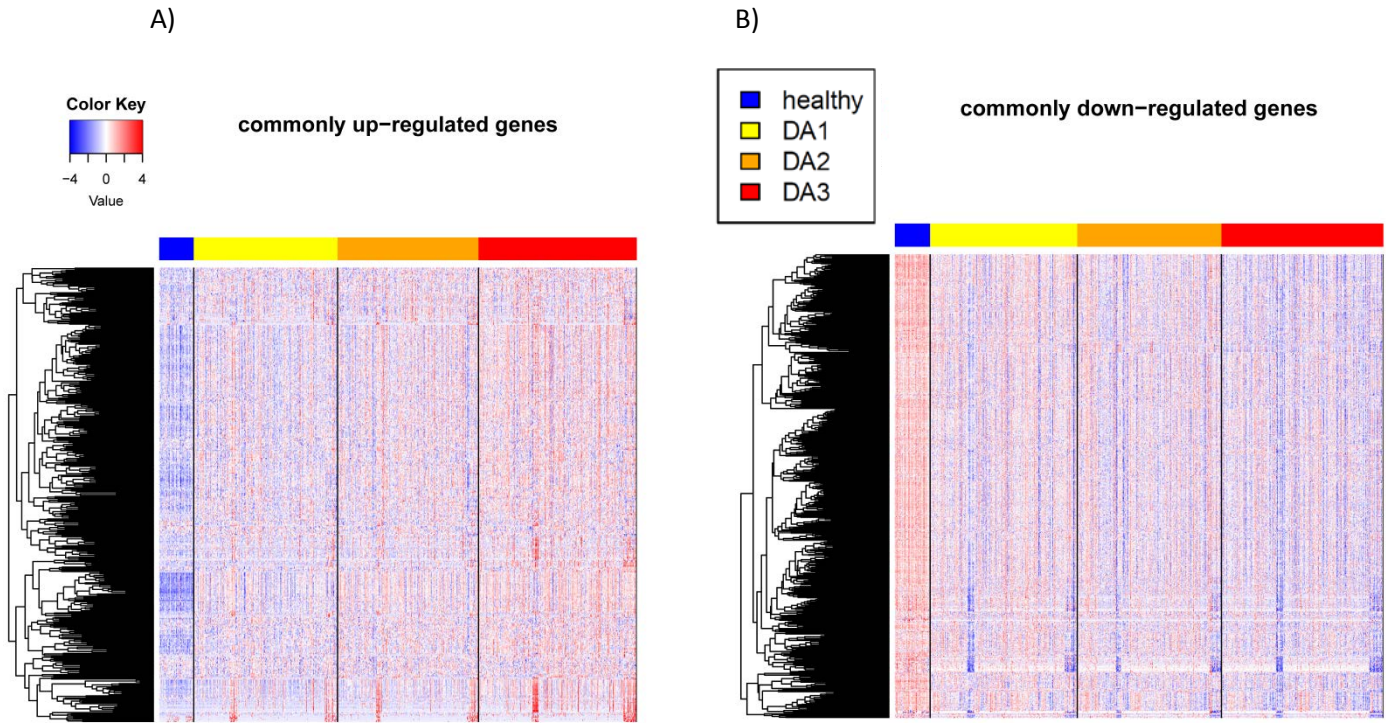

**Figure S6** Heatmap of the commonly up-regulated (A) and down-regulated (B) genes in SLE\_GSE65391. Color bars indicate the disease activity of patient samples or if it is a control. DA1, DA2 and DA3 represents three disease activity categories with DA3 the most severe and DA1 the mildest.

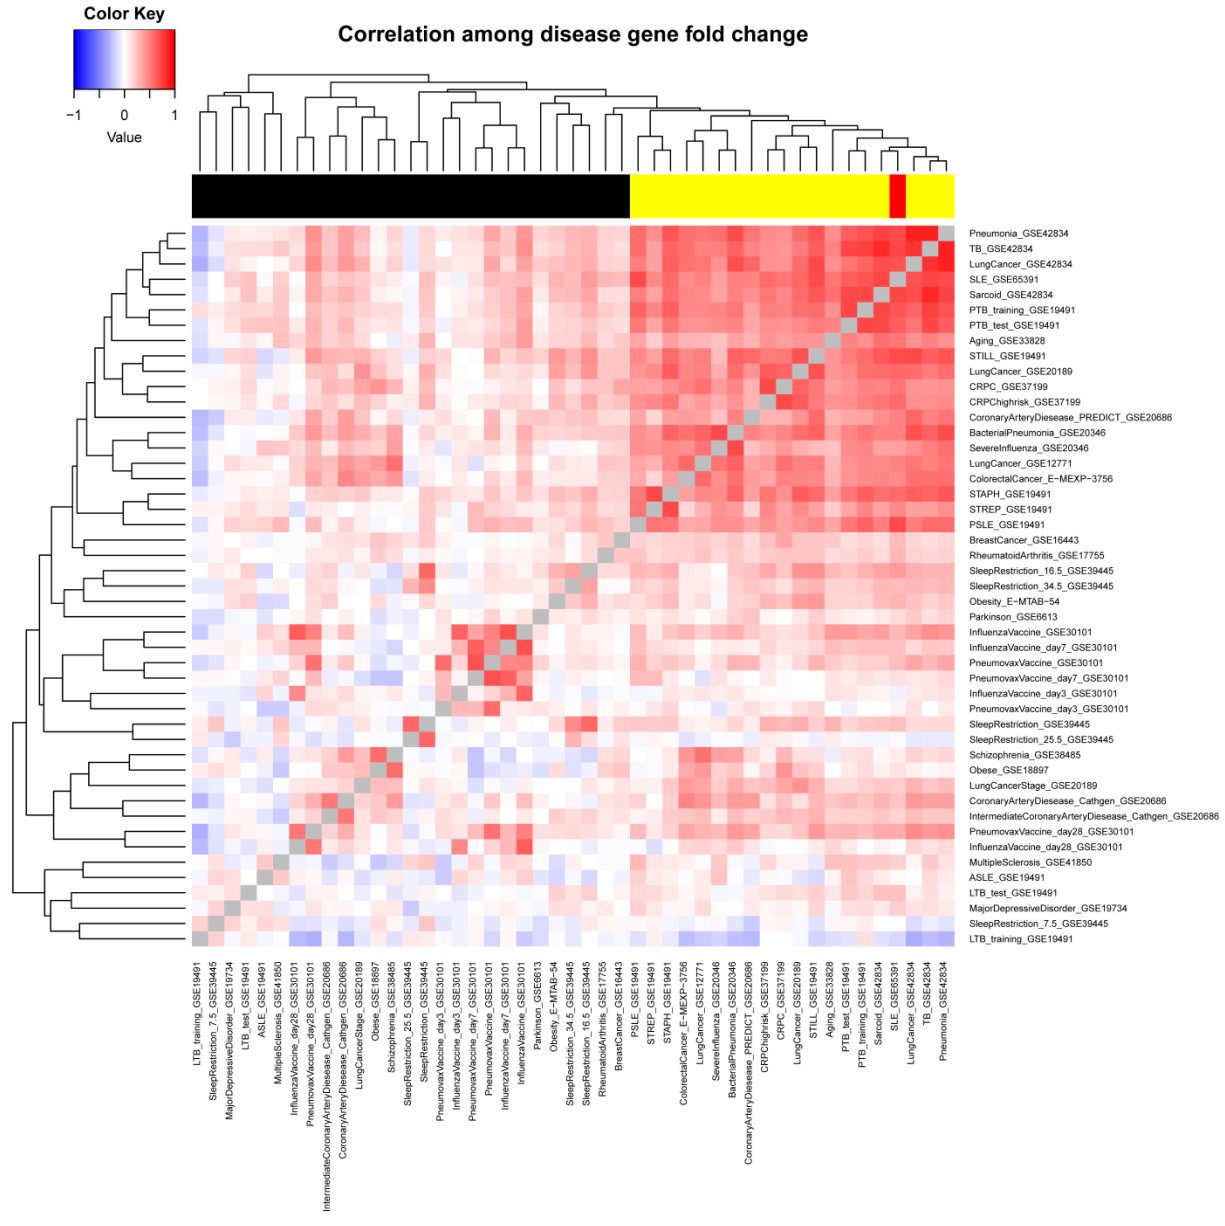

**Figure S7** Correlation among gene expression changes of diverse disease signature when the prospective dataset SLE\_GSE65391 were included. Yellow color in the side bar represents the dataset inside the tight cluster in Figure 1, and the red color represents the prospective dataset SLE\_GSE65391.

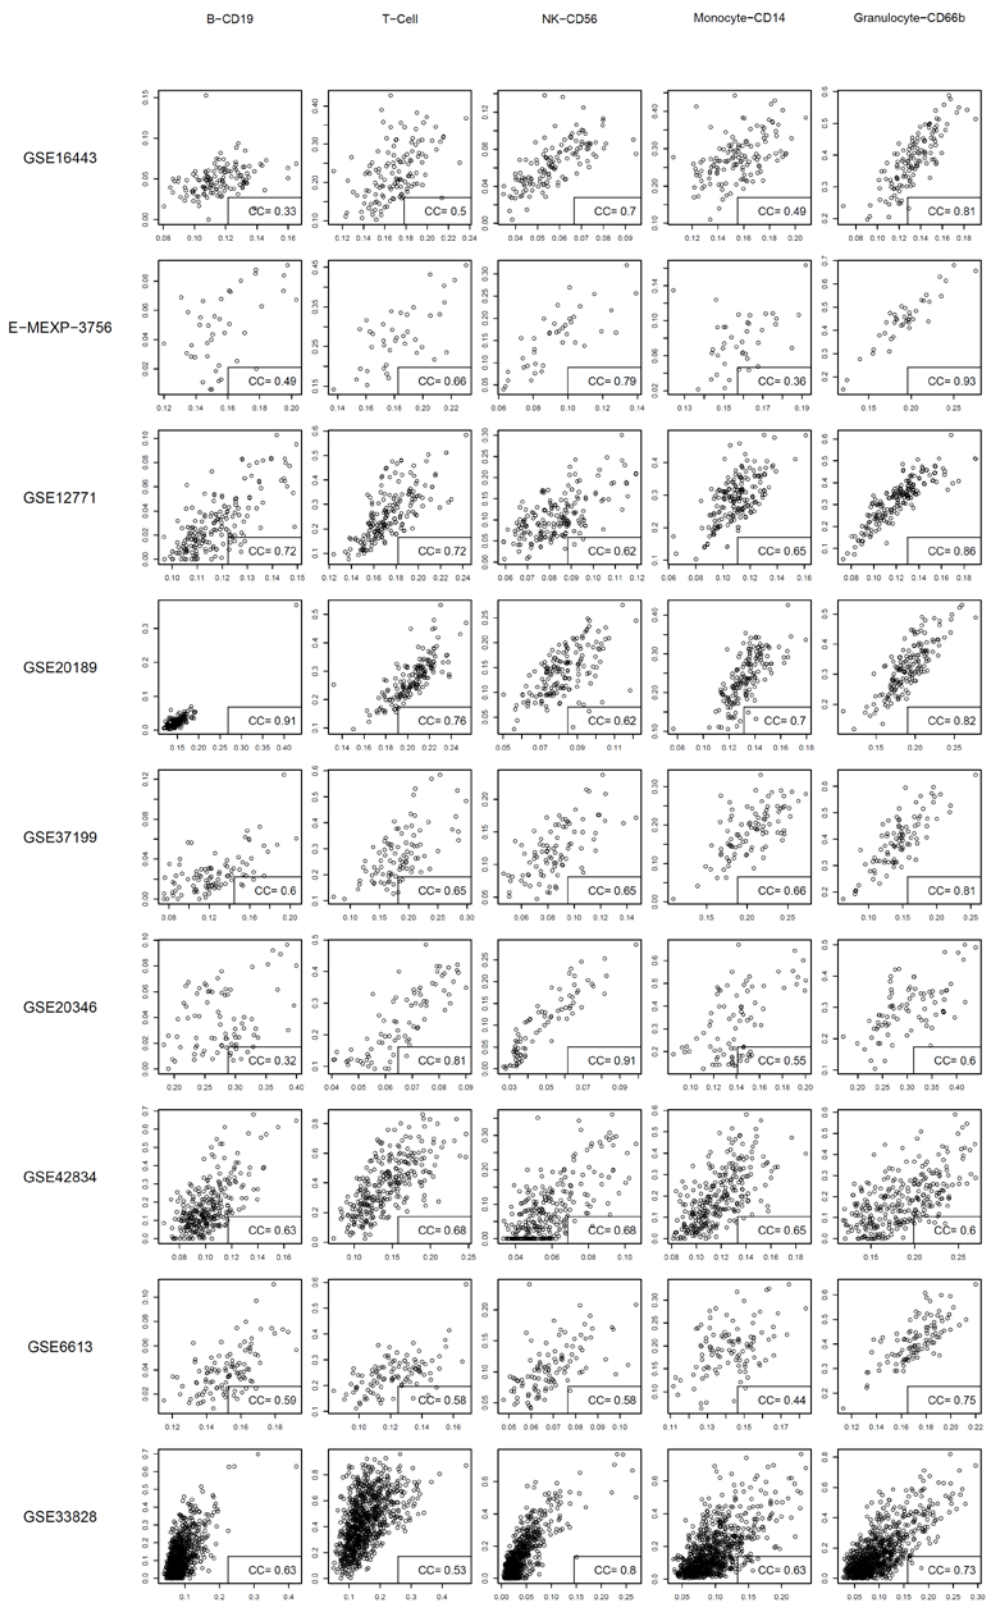

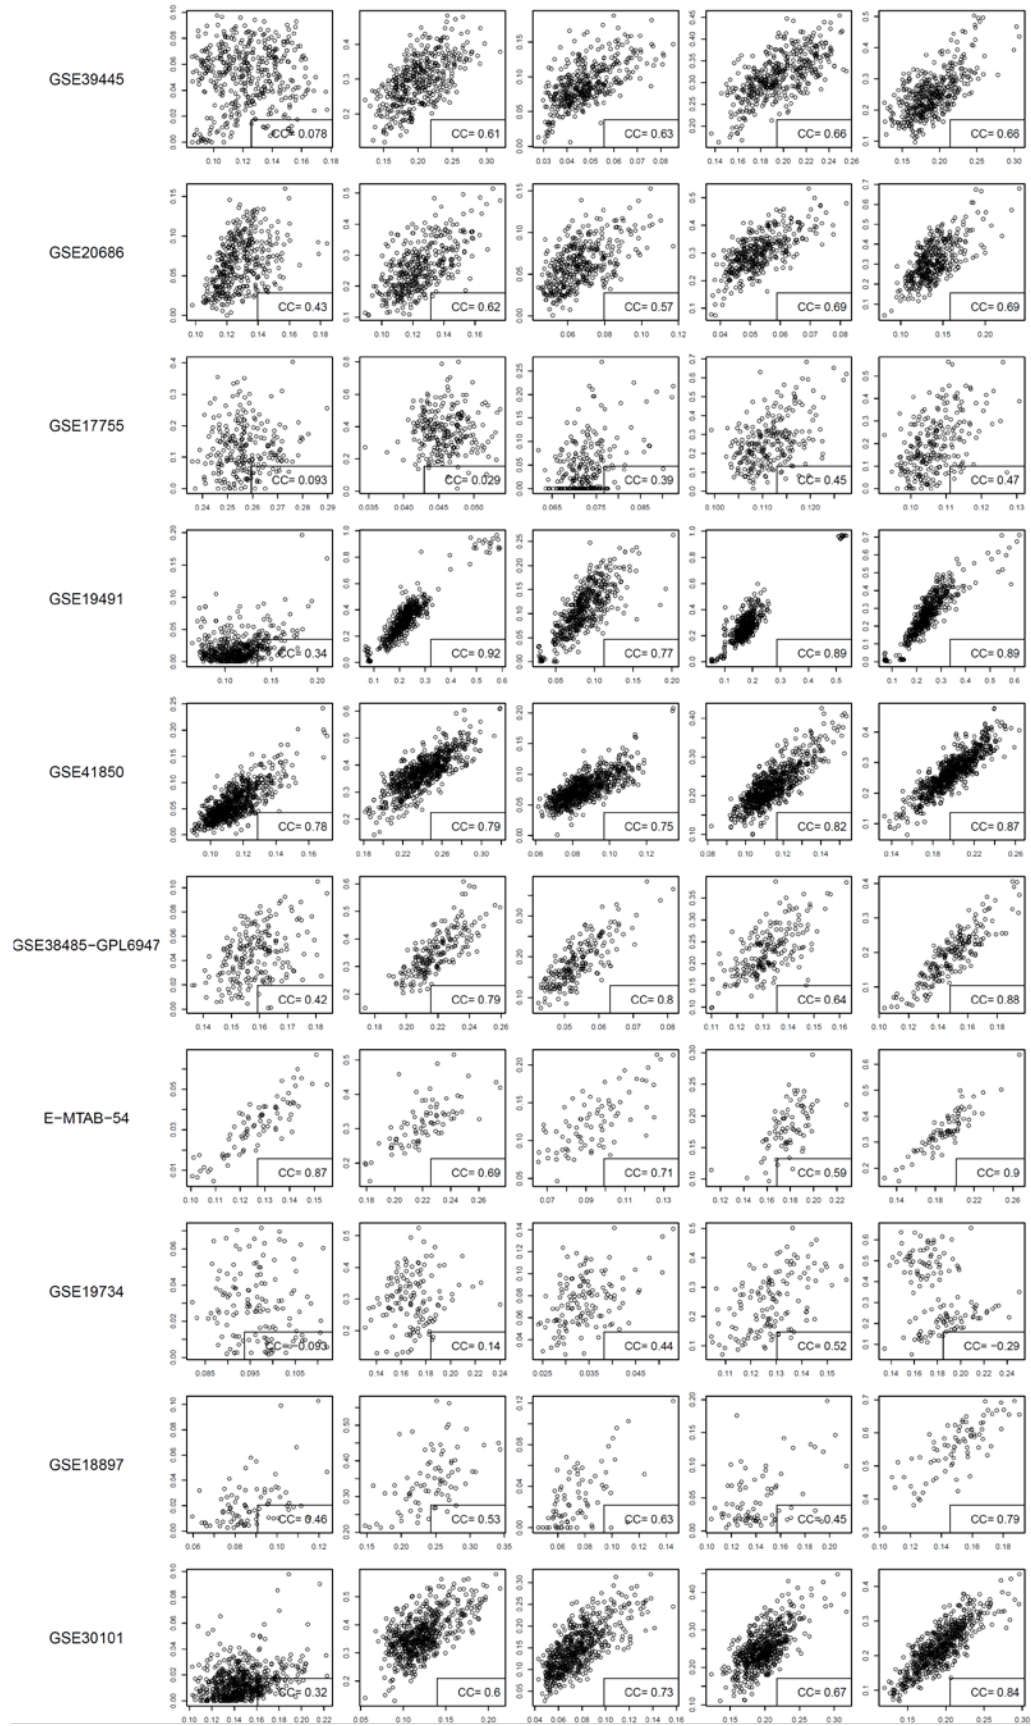



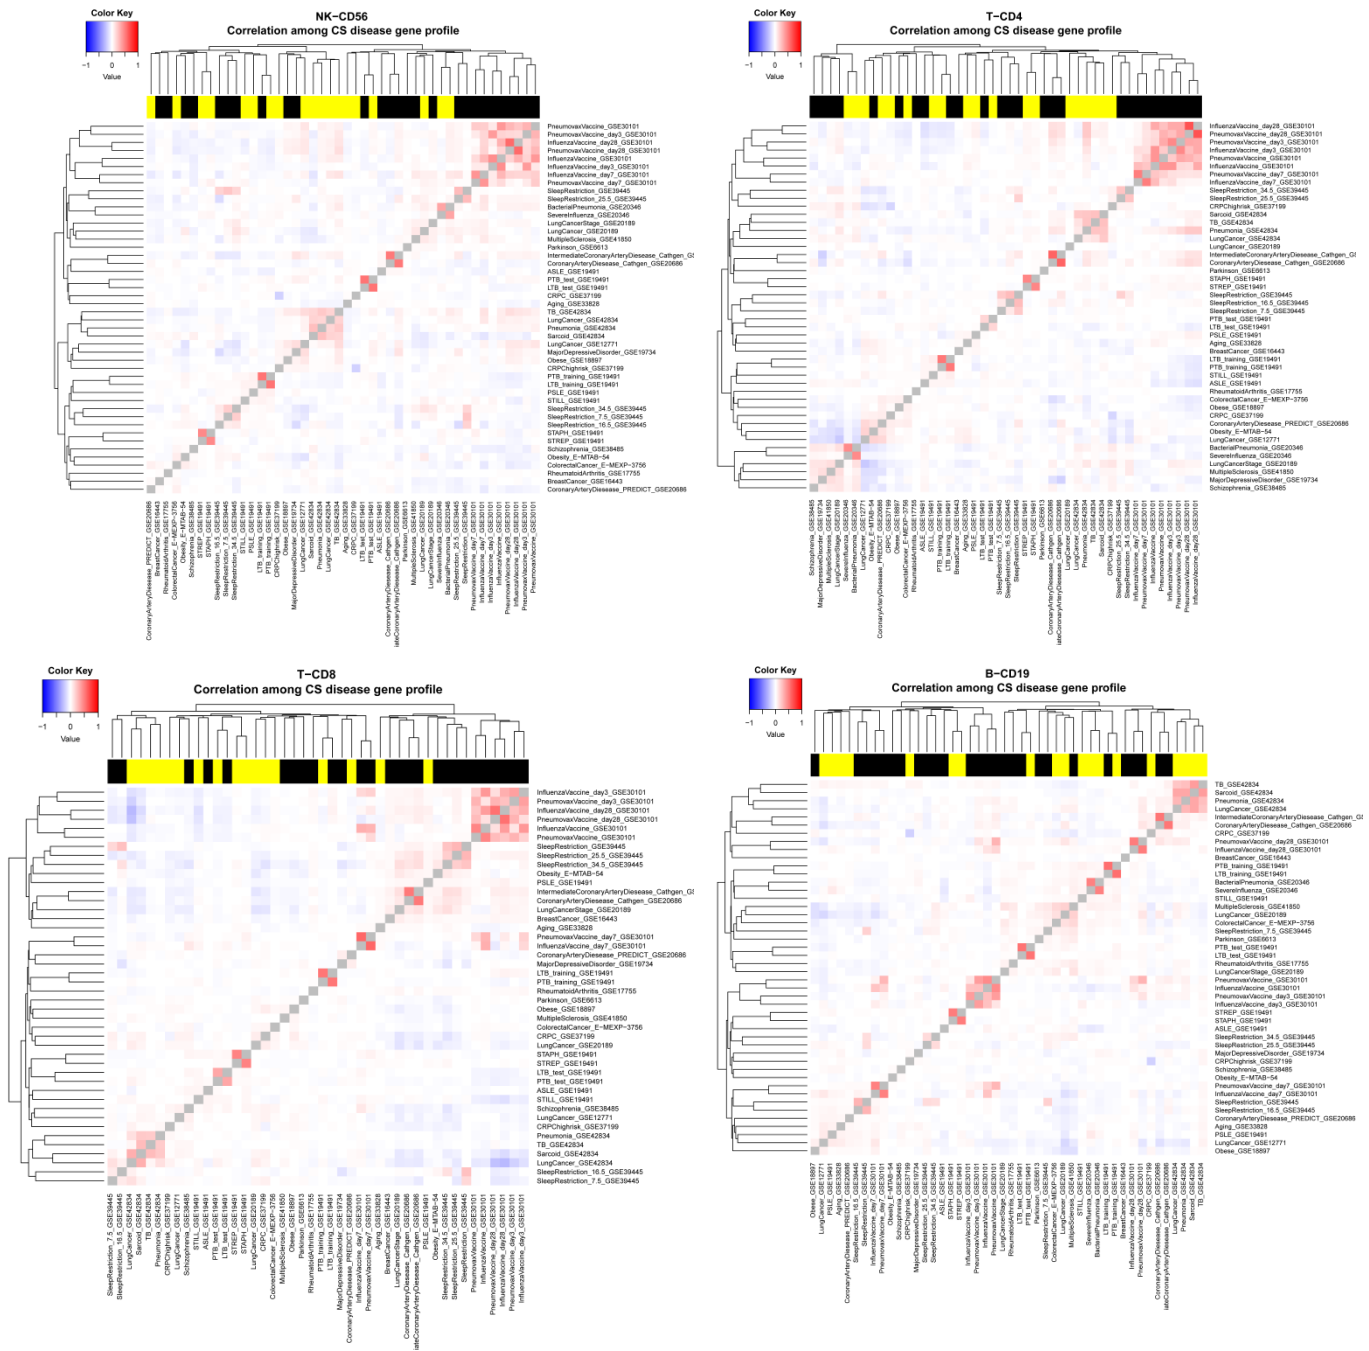

**Figure S9** Disease similarity based on cell type-specific expression difference. For each disease dataset and each cell type, csSAM algorithm outputs a t-statistic profile representing how genes are differentially expressed in this cell type and in this disease dataset. Each heatmap above represents one cell type, and each cell in the heatmap represents correlation coefficient of the t-statistic profile of the two corresponding disease datasets. (Please refer to the method section of similarity among disease gene signatures in the main manuscript about details in calculating correlation coefficients). Yellow color in the side bar indicates the dataset is inside the tight cluster in Figure 1.

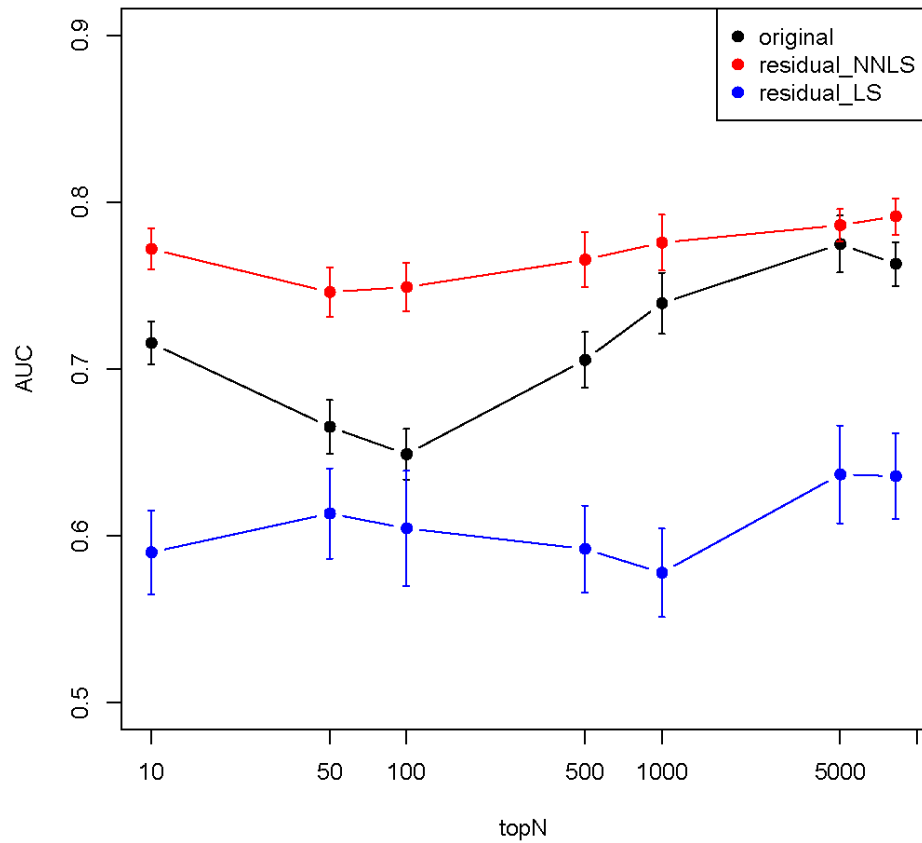

**Figure S10** Performance of disease-specific classifiers based on the original whole blood gene expression profile or the residual expression profile. The cell type specific expression profiles used in computing residual expression profile was calculated in two different ways, i.e., non-negative least square (NNLS) or ordinal least square (LS). Please refer to the legend of Figure 6 for more details.
